# Supplementary material for: High-pressure phase transition and amorphization of BaV2O6
Source: Royal Society of Chemistry journal article supplement (doi:10.1039/d4dt03091e), 2024-12-09
Supplement: d4dt03091e1.pdf [file d4dt03091e1.pdf]

## Supplementary Material

### High-Pressure Phase Transition and Amorphization of **BaV<sub>2</sub>O<sub>6</sub>**

Peijie Zhang,<sup>a,\*</sup> Pablo Botella,<sup>a</sup> Neha Bura,<sup>a</sup> Jose-Luis Rodrigo,<sup>a</sup> Josu Sanchez-Martin,<sup>a</sup> David Vie,<sup>b</sup> Catalin Popescu,<sup>c</sup> and Daniel Errandonea<sup>a</sup>

<sup>a</sup>Departamento de Física Aplicada–Instituto de Ciencia de Materiales, MALTA Consolider, Team, Universidad de Valencia, Edificio de Investigación, C/Dr. Moliner 50, Burjassot, 46100 Valencia, Spain.

<sup>b</sup>Institut de Ciència dels Materials de la Universitat de València, Apartado de Correos 2085, E-46071 València, Spain.

<sup>c</sup>CELLS-ALBA Synchrotron Light Facility, 08290 Cerdanyola del Vallès, Barcelona, Spain.

\*Corresponding author: [zpei@uv.es](mailto:zpei@uv.es)

**Table S1** Crystal structure of the C2 phase BaV<sub>2</sub>O<sub>6</sub> at 4.2 GPa determined by Le Bail refinement and subsequently optimized by DFT calculation with the lattice parameters fixed at the experimental value.

| Compound     |        | BaV <sub>2</sub> O <sub>6</sub> |        |
|--------------|--------|---------------------------------|--------|
| Pressure     |        | 4.2 GPa                         |        |
| Space group  |        | C2                              |        |
| <i>a</i> (Å) |        | 11.8936                         |        |
| <i>b</i> (Å) |        | 8.3255                          |        |
| <i>c</i> (Å) |        | 7.6719                          |        |
| <i>β</i> °   |        | 90.9302                         |        |
| Z            |        | 6                               |        |
| Ba1          | 0.8341 | -0.0015                         | 0.4992 |
| Ba2          | 0      | 0.0016                          | 0      |
| V1           | 0.4315 | 0.8186                          | 0.2658 |
| V2           | 0.5681 | 0.1803                          | 0.2633 |
| V3           | 0.2482 | 0.7506                          | 0.9264 |
| O1           | 0.4994 | -0.0017                         | 0.7750 |
| O2           | 0.9819 | 0.8330                          | 0.3009 |
| O3           | 0.0172 | 0.1646                          | 0.3041 |
| O4           | 0.2386 | 0.9203                          | 0.8152 |
| O5           | 0.7587 | 0.0853                          | 0.8087 |
| O6           | 0.1546 | 0.6722                          | 0.4315 |
| O7           | 0.8467 | 0.3283                          | 0.4317 |
| O8           | 0.1288 | 0.7411                          | 0.0630 |
| O9           | 0.8698 | 0.2579                          | 0.0634 |

**Table S2** Comparison of bulk modulus ( $B_0$ ) of different  $MV_2O_6$  (M = Ba, Mg, Zn, and Pb) compounds and  $Ba_3V_2O_8$  compound.<sup>1-5</sup>

| Compounds    | $B_0$ / GPa                                        | Range / GPa | $B_0$ / GPa                                        | Range / GPa | $B_0$ / GPa            | Range / GPa |
|--------------|----------------------------------------------------|-------------|----------------------------------------------------|-------------|------------------------|-------------|
| $BaV_2O_6$   | 50(1) <sub>Exp.</sub><br>57.2(2) <sub>Cal.</sub>   | 0-4         | 50.4(8) <sub>Exp.</sub><br>58.6(5) <sub>Cal.</sub> | 4-8         |                        |             |
| $MgV_2O_6$   | 53(5) <sub>Exp.</sub>                              | 0-4         | 188(5) <sub>Exp.</sub>                             | 4-33        | 255(9) <sub>Exp.</sub> | 20-33       |
| $ZnV_2O_6$   | 147(2) <sub>Exp.</sub><br>146.74 <sub>Cal.</sub>   | 0-15        | 237(1) <sub>Exp.</sub>                             | 15-25       |                        |             |
| $PbV_2O_6$   | 86.1(9) <sub>Exp.</sub><br>82.6(4) <sub>Cal.</sub> | 0-20        |                                                    |             |                        |             |
| $Ba_3V_2O_8$ | 136(4) <sub>Exp.</sub>                             | 0-29        |                                                    |             |                        |             |

**Table S3** The type and connection of vanadium oxide polyhedra in  $MV_2O_6$  ( $M = Ba, Mg, Zn, \text{ and } Pb$ ) compounds and  $Ba_3V_2O_8$  compound.<sup>6-10</sup>

| Compounds                    | Type and connection of vanadium oxide polyhedra |
|------------------------------|-------------------------------------------------|
| $BaV_2O_6$                   |                                                 |
| $MgV_2O_6$<br>and $ZnV_2O_6$ |                                                 |
| $PbV_2O_6$                   |                                                 |
| $Ba_3V_2O_8$                 |                                                 |

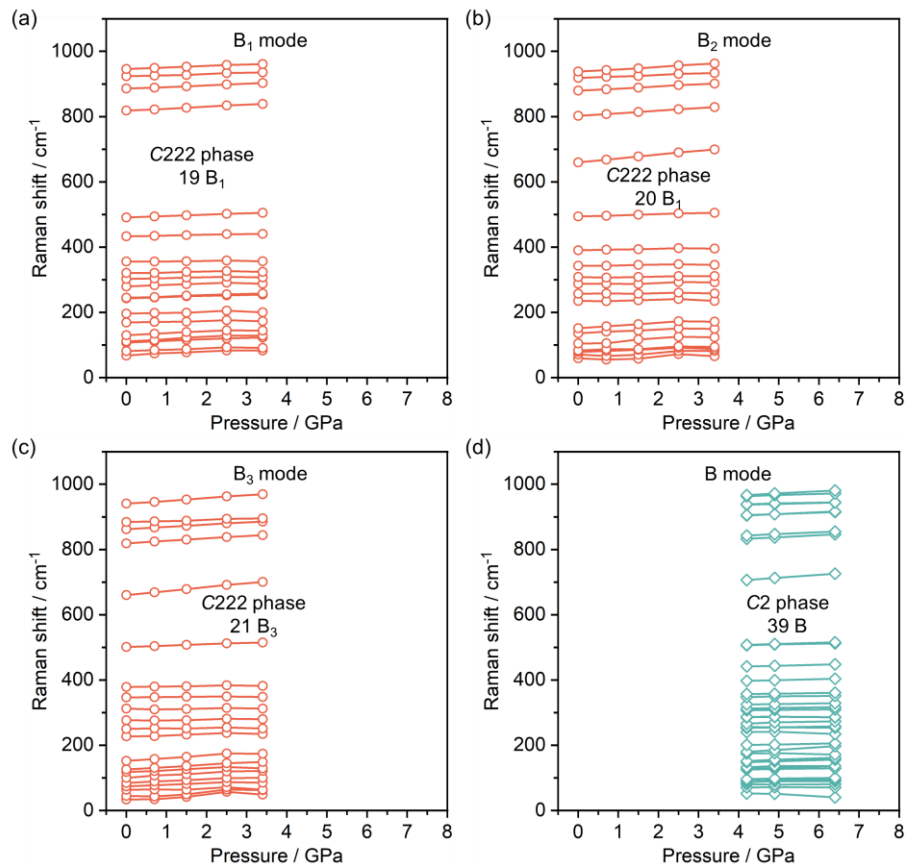

**Figure S1** Pressure-dependence of Raman B<sub>1</sub>, B<sub>2</sub> and B<sub>3</sub> modes of the C222 phase as well as Raman B modes of the C2 phase.

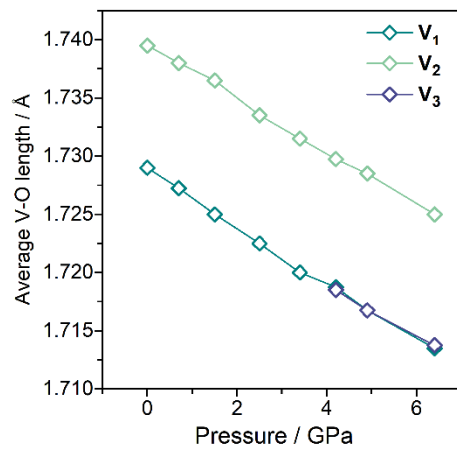

**Figure S2** Pressure-dependence of the average V-O length in different [VO<sub>4</sub>] tetrahedral units.

## Reference

1. R. Tang, Y. Li, S. Xie, N. Li, J. Chen, C. Gao, P. Zhu and X. Wang, *Sci. Rep.*, 2016, **6**, 38566.
2. R. Tang, Y. Li, N. Li, D. Han, H. Li, Y. Zhao, C. Gao, P. Zhu and X. Wang, *J. Phys. Chem. C*, 2014, **118**, 10560.
3. A. Beltrán, L. Gracia and J. Andrés, *J. Phys. Chem. C*, 2019, **123**, 3239.
4. J. Sanchez Martin, J. Pellicer-Porres, R. Turnbull, D. Diaz-Anichtchenko, S. Anzellini, A. Liang, C. Popescu, M. Bettinelli, P. Rodríguez-Hernandez, A. Munoz and D. Errandonea, *Dalton Trans.*, 2024, **53**, 11490.
5. A. Grzechnik and P. F. McMillan, *Physica B*, 1998, **252**, 268.
6. T. Yao, Y. Oka and N. Yamamoto, *Inorganica Chim. Acta*, 1995, **238**, 165.
7. H. N. Ng and C. Calvo, *Can. J. Chem.*, 1972, **50**, 3619.
8. G. D. Andreetti, G. Calestani, A. Montenero, M. Bettinelli, *Z. Kristallogr.*, 1984, **168**, 53.
9. B. D. Jordan and C. Calvo, *Can. J. Chem.*, 1974, **52**, 2701.
10. P. Süsse, M.J. Buerger, *Z. Kristallogr.*, 1970, **134**, 161.
